# Supplementary material for: MPI-RCDD: A Framework for MPI Runtime Communication Deadlock Detection
Source: Springer Nature journal article supplement (doi:10.1007/s11390-020-9701-4), 2020-03-01
Supplement: 11390_2020_9701_MOESM1_ESM.pdf [file 11390_2020_9701_MOESM1_ESM.pdf]

# **MPI-RCDD: A Framework for MPI Runtime Communication Deadlock Detection**

**Hongmei Wei<sup>1</sup>, Jian Gao<sup>2\*</sup>, Peng Qing<sup>2</sup>, Kang Yu<sup>2</sup>,  
Yanfei Fang<sup>2</sup> and Minglu Li<sup>1</sup>**

**(1. Department of Computer Science & Engineering, Shanghai jiaotong University, Shanghai 200240, China)**

**(2. Jiangnan Institute of Computing Technology, Wuxi 214083, China)**

Wei HM, Gao J, Qing P et al. MPI-RCDD: A framework for MPI runtime communication deadlock detection. JOURNAL OF COMPUTER SCIENCE AND TECHNOLOGY 35(2): 395–411 Mar. 2020. DOI 10.1007/s11390-020-9701-4

# Research Background

- The Message Passing Interface (MPI) has become a de facto standard for programming models of high performance computing (HPC)
- Establishing communication deadlock-freedom in MPI programs is known to be a challenging exercise
- MPI communication deadlock makes it difficult for programs to guarantee their correctness, which seriously affects availability of HPC system
- Due to the significant uncertainty and complexity of the execution of the MPI process, communication deadlock detection becomes extremely difficult.
- Although many scholars have conducted a lot of research on the problem of MPI communication deadlock detection, **a scalable solution remains elusive**

# Contributions

- MPI-RCDD: A framework for MPI runtime communication deadlock detection is proposed
  - The first time to design and optimize in the MPI runtime library to solve the MPI deadlock problem
  - Many processes are involved in the deadlock detection of the program, with strong capability and scalability
- A new MPI communication deadlock detection algorithm based on  $AND \oplus OR$  wait graph model is proposed
  - Using the asynchronous processing thread provided by the MPI runtime environment to transparently implement the dependency transfer between processes
- Multiple typical benchmarks were used to evaluate the effectiveness of the MPI-RCDD
  - Capability : Umpire Test Suit
  - Scalability : NPB benchmarks

# Experiments

## • Capability

- MPI-RCDD always detects deadlocks within valid time and does not generate false positives

Results on the X86 cluster

| Test Program                  | Deadlock Type | Process Size | Tool     | Detection Time (s) |
|-------------------------------|---------------|--------------|----------|--------------------|
| 2D-Diffusion                  | potential     | 4            | MPI-RCDD | 0.284              |
|                               |               |              | MUST     | 0.283              |
| Heat Error                    | potential     | 32           | MPI-RCDD | 0.276              |
|                               |               |              | MUST     | 0.369              |
| basic-deadlock                | deterministic | 4            | MPI-RCDD | 0.232              |
|                               |               |              | MUST     | 0.226              |
| basic-deadlock2               | deterministic | 8            | MPI-RCDD | 0.185              |
|                               |               |              | MUST     | 0.265              |
| irecv-deadlock                | deterministic | 16           | MPI-RCDD | 0.313              |
|                               |               |              | MUST     | 0.299              |
| wait-deadlock                 | deterministic | 32           | MPI-RCDD | 0.34               |
|                               |               |              | MUST     | 0.448              |
| waitall-deadlock              | deterministic | 4            | MPI-RCDD | 0.226              |
|                               |               |              | MUST     | 0.224              |
| waitany-deadlock              | deterministic | 8            | MPI-RCDD | 0.213              |
|                               |               |              | MUST     | 0.212              |
| any_src-can-deadlock7         | potential     | 16           | MPI-RCDD | 0.265              |
|                               |               |              | MUST     | 0.298              |
| any_src-can-deadlock9         | potential     | 32           | MPI-RCDD | 0.275              |
|                               |               |              | MUST     | 0.303              |
| any_src-wait-deadlock         | potential     | 4            | MPI-RCDD | 0.212              |
|                               |               |              | MUST     | 0.207              |
| any_src-waitall-deadlock      | potential     | 8            | MPI-RCDD | 0.354              |
|                               |               |              | MUST     | 0.372              |
| any_src-waitany-deadlock      | potential     | 16           | MPI-RCDD | 0.511              |
|                               |               |              | MUST     | 0.578              |
| bcast-deadlock                | deterministic | 32           | MPI-RCDD | 0.243              |
|                               |               |              | MUST     | 0.286              |
| collective-misorder           | deterministic | 4            | MPI-RCDD | 0.335              |
|                               |               |              | MUST     | 0.323              |
| collective-misorder2          | deterministic | 8            | MPI-RCDD | 0.338              |
|                               |               |              | MUST     | 0.402              |
| collective-misorder-allreduce | deterministic | 16           | MPI-RCDD | 0.244              |
|                               |               |              | MUST     | 0.317              |

Results on the Sunway TaihuLight

| Test Program          | Deadlock Type | Process Size | Tool     | Detection Time (s) |
|-----------------------|---------------|--------------|----------|--------------------|
| 2D-Diffusion          |               | 1024         | MPI-RCDD | 0.752              |
|                       |               |              | MUST     | 1.319              |
|                       |               |              | MUST     | 1.319              |
| Ex-basic-deadlock     | deterministic | 2048         | MPI-RCDD | 0.909              |
|                       |               |              | MUST     | 1.767              |
|                       |               |              | MUST     | 1.767              |
| basic-deadlock        | deterministic | 4096         | MPI-RCDD | 1.114              |
|                       |               |              | MUST     | 2.404              |
|                       |               |              | MUST     | 2.404              |
| irecv-deadlock        | deterministic | 1024         | MPI-RCDD | 0.677              |
|                       |               |              | MUST     | 1.224              |
|                       |               |              | MUST     | 1.224              |
| Ex-irecv-deadlock     | deterministic | 2048         | MPI-RCDD | 0.856              |
|                       |               |              | MUST     | 1.821              |
|                       |               |              | MUST     | 1.821              |
| wait-deadlock         | deterministic | 4096         | MPI-RCDD | 1.073              |
|                       |               |              | MUST     | 2.676              |
|                       |               |              | MUST     | 2.676              |
| waitany-deadlock      | deterministic | 1024         | MPI-RCDD | 0.754              |
|                       |               |              | MUST     | 1.365              |
|                       |               |              | MUST     | 1.365              |
| any_src-can-deadlock9 | potential     | 2048         | MPI-RCDD | 0.968              |
|                       |               |              | MUST     | 2.29               |
|                       |               |              | MUST     | 2.29               |
| basic-deadlock        | deterministic | 4096         | MPI-RCDD | 1.133              |
|                       |               |              | MUST     | 2.986              |
|                       |               |              | MUST     | 2.986              |
| wait-deadlock         | potential     | 1024         | MPI-RCDD | 0.841              |
|                       |               |              | MUST     | 1.506              |
|                       |               |              | MUST     | 1.506              |
| Ex-waitany-deadlock   | potential     | 2048         | MPI-RCDD | 0.935              |
|                       |               |              | MUST     | 2.098              |
|                       |               |              | MUST     | 2.098              |
| wait-deadlock         | potential     | 4096         | MPI-RCDD | 1.173              |
|                       |               |              | MUST     | 3.33               |
|                       |               |              | MUST     | 3.33               |
| bcast-deadlock        | deterministic | 1024         | MPI-RCDD | 0.664              |
|                       |               |              | MUST     | 1.158              |
|                       |               |              | MUST     | 1.158              |
| collective-misorder   | deterministic | 2048         | MPI-RCDD | 0.725              |
|                       |               |              | MUST     | 1.658              |
|                       |               |              | MUST     | 1.658              |
| collective-misorder   | deterministic | 4096         | MPI-RCDD | 0.962              |
|                       |               |              | MUST     | 2.326              |
|                       |               |              | MUST     | 2.326              |

## • Scalability

- MPI-RCDD's deadlock detection work subtly bypasses the strong correlation with program size, and it has strong scalability, reaching the expected goal of processing large-scale parallel applications

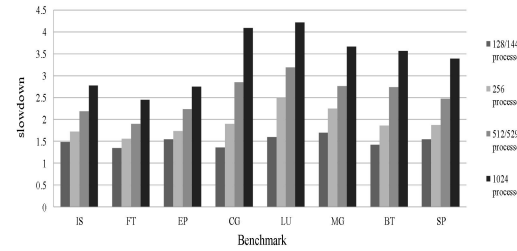

Results for MUST on the X86 cluster

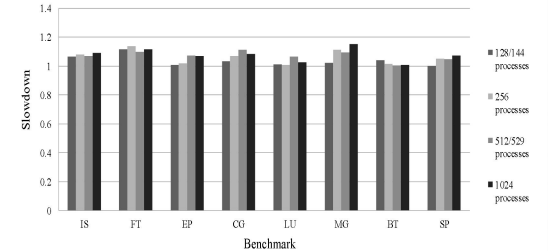

Results for MPI-RCDD on the X86 cluster

Results of the NPB benchmark on X86 clusters (C scale)

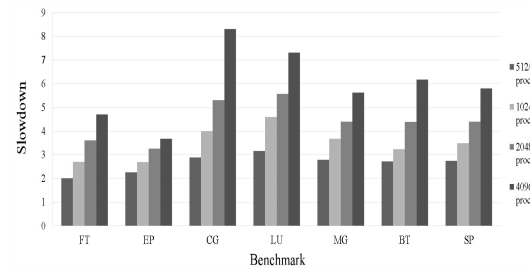

Results for MUST on the Sunway TaihuLight

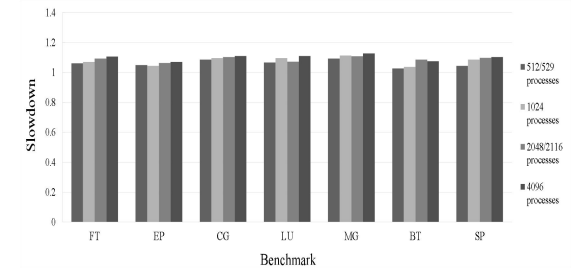

Results for MPI-RCDD on the Sunway TaihuLight

Results of the NPB benchmark on Sunway TaihuLight (D scale)

# Conclusions

- MPI-RCDD is not limited to a specific system structure and does not rely on additional components by closely linking the deadlock detection problem to the MPI runtime library
- The AODA algorithm we proposed combines two common deadlock analysis methods, message timeout and process dependency, to ensure that no false positives are generated, and the root cause of deadlock can be accurately located, alleviating the performance bottleneck of centralized analysis
- The capability and scalability of the MPI-RCDD was verified using a number of typical benchmarks with satisfactory results
